# Supplementary material
Source: PubMed Central journal article supplement (PMC9561060)
Supplement: NIHMS1839067-supplement-Supplementary_Information.pdf [file NIHMS1839067-supplement-Supplementary_Information.pdf]

# Supplementary Material

## Crosslinking of CD20 and CD38 by Drug-Free Macromolecular Therapeutics Enhances B Cell Apoptosis

M. Tommy Gambles<sup>1,2</sup>, Jiahui Li<sup>1,2</sup>, D. Christopher Radford<sup>1,4</sup>, Douglas Sborov<sup>3</sup>, Paul Shami<sup>3</sup>, Jiyuan Yang<sup>1,2\*</sup>, Jindřich Kopeček<sup>1,2,4\*</sup>

<sup>1</sup> Center for Controlled Chemical Delivery, University of Utah, Salt Lake City, UT 84112, USA

<sup>2</sup> Department of Pharmaceutics and Pharmaceutical Chemistry, University of Utah, Salt Lake City, UT 84112, USA

<sup>3</sup> Huntsman Cancer Institute, University of Utah, Salt Lake City, UT 84112, USA

<sup>4</sup> Department of Biomedical Engineering, University of Utah, Salt Lake City, Utah 84112, USA

\* Correspondence: jindrich.kopecek@utah.edu; jiyuan.yang@utah.edu

### Table of Contents

**Figure S1.** Fab'-MORF1 size exclusion chromatograms.

**Figure S2.** UV-Vis spectroscopy hybridization of nanoconjugates.

**Figure S3.** Size exclusion chromatograms of hybridized nanoconjugates.

**Figure S4.** CD20 and CD38 expression on Raji cells.

**Figure S5.** Single-target DFMT median effect plots.

**Figure S6.** Fab'<sub>DARA</sub> + Fab'<sub>RTX</sub> DFMT combination index experimental data.

**Figure S7.** Fab'<sub>DARA</sub> + Fab'<sub>OBN</sub> DFMT combination index experimental data.

**Figure S8.** Fab'<sub>ISA</sub> + Fab'<sub>RTX</sub> DFMT combination index experimental data.

**Figure S9.** Fab'<sub>ISA</sub> + Fab'<sub>OBN</sub> DFMT combination index experimental data.

**Figure S10.** Dual-target DFMT caspase 3 activation flow cytometry fluorescence histograms.

**Figure S11.** Dual-target DFMT Bax/Bcl-2 protein expression ratio.

**Figure S12.** Dual-target DFMT lysosomal enlargement inhibition using cathepsin B inhibitor.

**Figure S13.** Saline-treated mice weights and bone marrow immunostains.

**Figure S14.** Fab'<sub>RTX</sub> DFMT single dose mice weights and bone marrow immunostains.

**Figure S15.** Fab'<sub>RTX</sub> DFMT triple dose mice weights and bone marrow immunostains.

**Figure S16.** Fab'<sub>DARA</sub> DFMT single dose mice weights and bone marrow immunostains.

**Figure S17.** Fab'<sub>RTX</sub> DFMT triple dose mice weights and bone marrow immunostains.

**Figure S18.** Dual-target DFMT single dose mice weights and bone marrow immunostains.

**Figure S19.** Dual-target DFMT single dose mice weights and bone marrow immunostains.

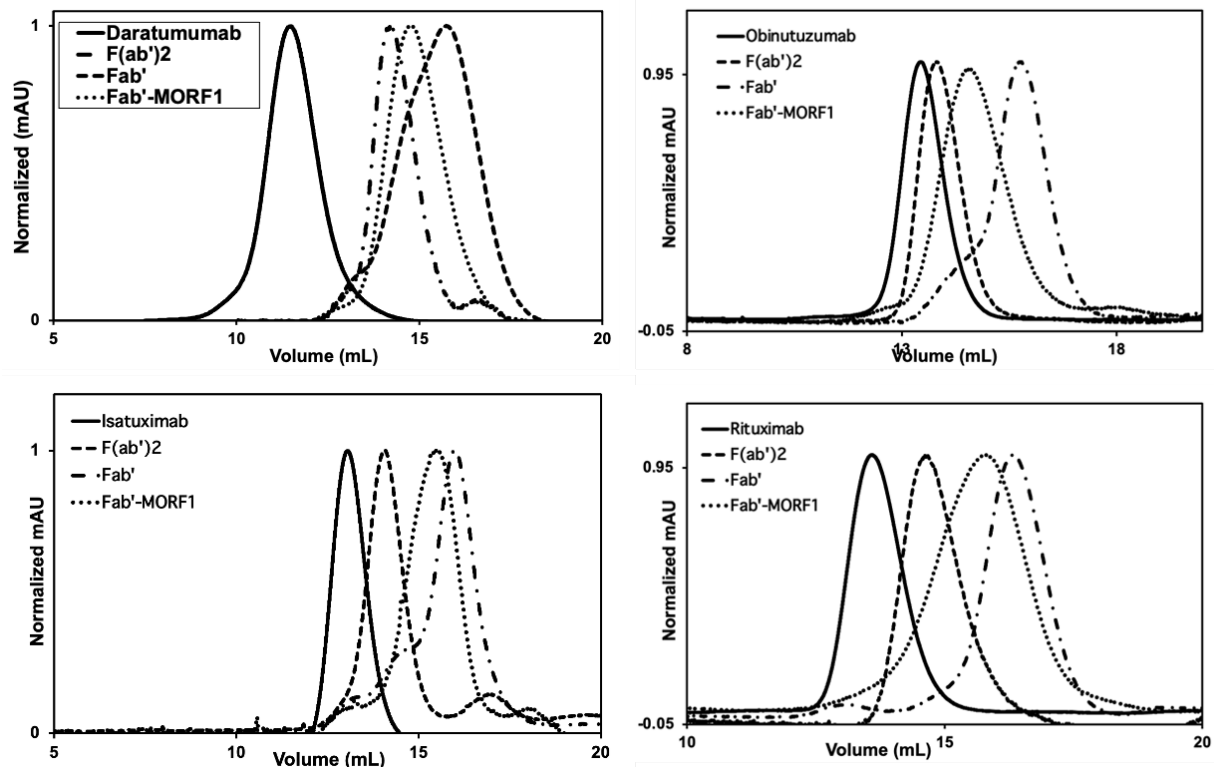

**Figure S1.** Fab'-MORF1 size exclusion chromatograms of intermediates and final products.

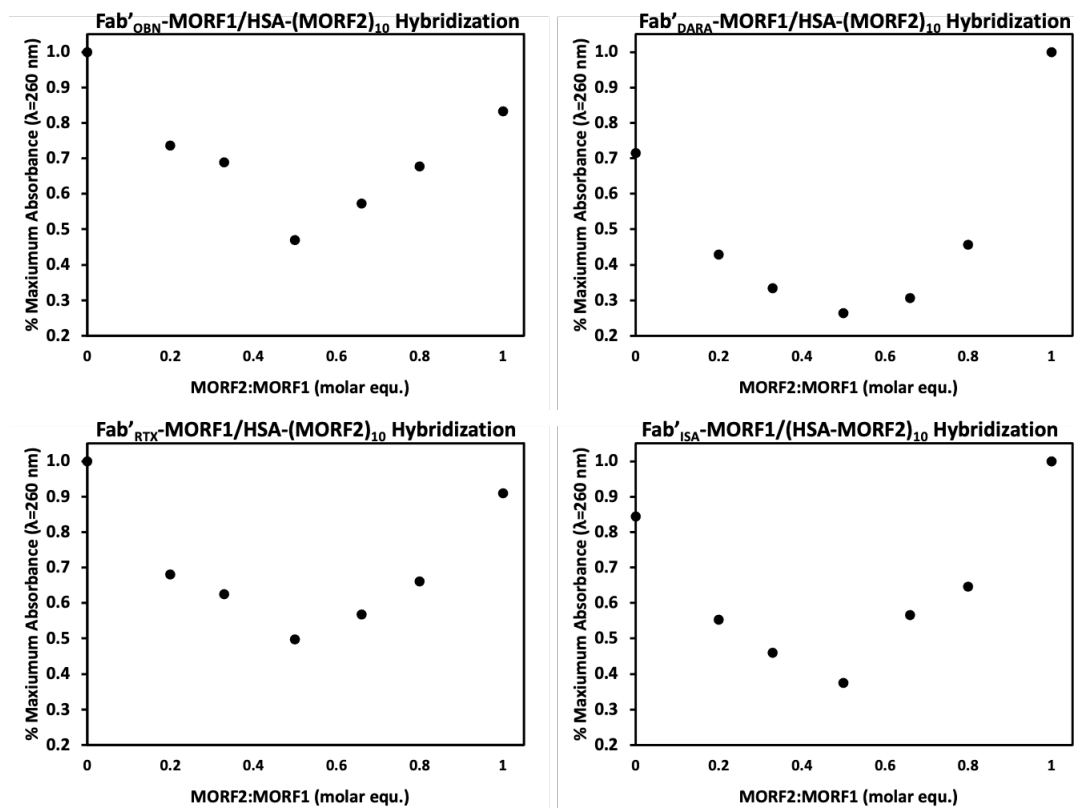

**Figure S2.** UV-Vis spectrophotometry observations of morpholino hybridization between Fab'-MORF1 nanoconjugates and HSA-(MORF2)<sub>10</sub>. Absorbance at  $\lambda = 260$  nm was monitored for base pair complementation with varying molar equivalences of MORF1:MORF2 in a PBS pH 7.4 solution  $\epsilon_{\text{MORF1}} = 278,000 \text{ M}^{-1}\text{cm}^{-1}$ ;  $\epsilon_{\text{MORF2}} = 252,120 \text{ M}^{-1}\text{cm}^{-1}$ . Hybridization is indicated by a decrease in absorbance at this wavelength.

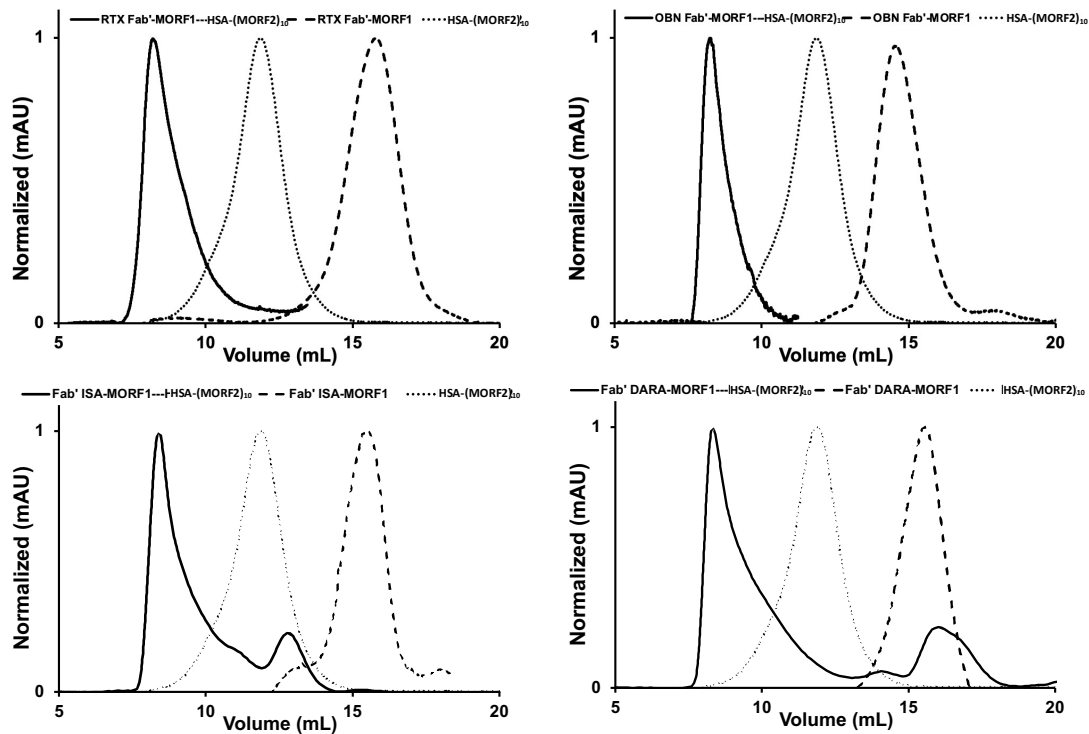

**Figure S3.** Fab'-MORF1 and HSA-(MORF2)<sub>10</sub> hybridization determined by SEC with a Superdex 200 10/300 GL column, PBS (pH 7.4) as eluant at 0.4 mL/min flow rate. A 1:1 MORF1:MORF2 molar equivalent solution of Fab'-MORF1 and HSA-(MORF2)<sub>10</sub> was premixed in PBS and allowed to hybridize for 10 min. Hybridized nanoconjugate (solid) was compared to Fab'-MORF1 (dashed) and HSA-(MORF2)<sub>10</sub> (dotted).

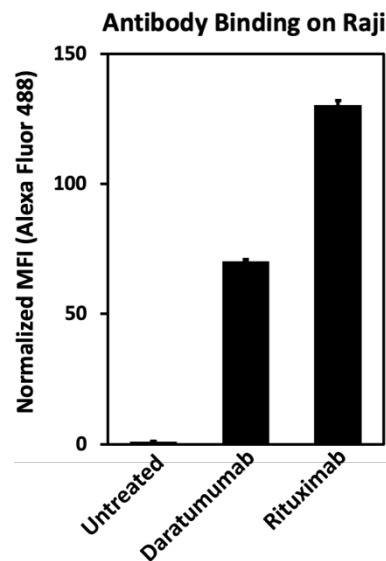

**Figure S4.** Fluorescence quantification of Rituximab mAb to Daratumumab mAb binding on Raji cells indicating about 2-fold higher CD20 expression than CD38 expression. Binding was measured by treating cells with mAb for 1 h at 4 °C followed by PBS wash followed by 1 h exposure to Fluor488 goat anti-human secondary antibody. Fluorescence of secondary antibody binding was quantified using flow cytometry as a mean fluorescent intensity and normalized to unstained cells. Higher CD20 expression would suggest better response to anti-CD20 DFMT systems on this cell type.

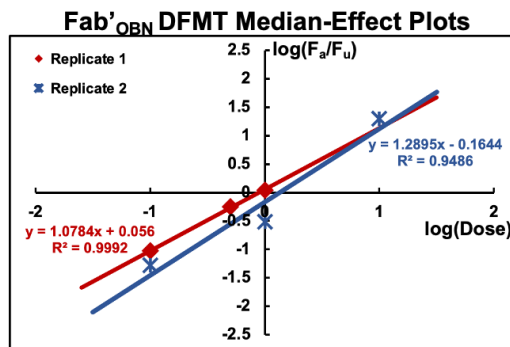

| Fab' <sub>OBN</sub> DFMT | D <sub>m</sub> (nM) | m    | r     |
|--------------------------|---------------------|------|-------|
| Replicate 1              | 1.34                | 1.29 | 0.974 |
| Replicate 2              | 0.887               | 1.08 | 0.999 |

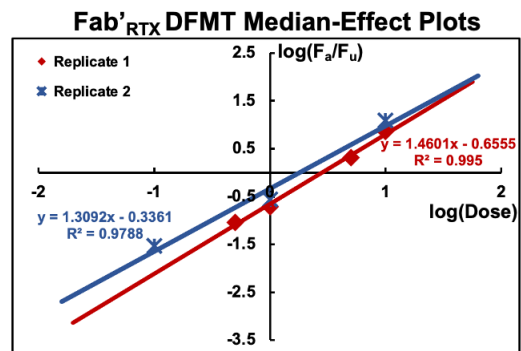

| Fab' <sub>RTX</sub> DFMT | D <sub>m</sub> (nM) | m    | r     |
|--------------------------|---------------------|------|-------|
| Replicate 1              | 1.81                | 1.31 | 0.989 |
| Replicate 2              | 2.81                | 1.46 | 0.997 |

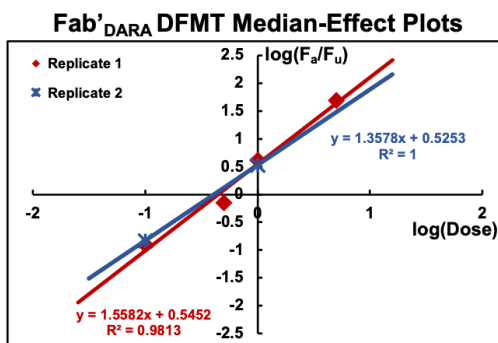

| Fab' <sub>DARA</sub> DFMT | D <sub>m</sub> (nM) | m    | r     |
|---------------------------|---------------------|------|-------|
| Replicate 1               | 0.410               | 1.36 | 0.974 |
| Replicate 2               | 0.447               | 1.56 | 0.991 |

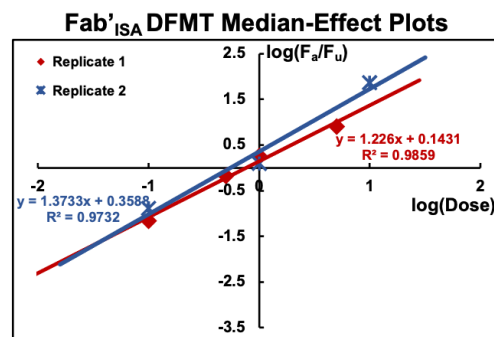

| Fab' <sub>ISA</sub> DFMT | D <sub>m</sub> (nM) | m    | r     |
|--------------------------|---------------------|------|-------|
| Replicate 1              | 0.548               | 1.37 | 0.987 |
| Replicate 2              | 0.764               | 1.23 | 0.993 |

**Figure S5.** Individual Fab' DFMT Median-Effect Plots, correlation data, slope and EC<sub>50</sub> values reported as D<sub>m</sub>, or x-intercept. Two replicates per Fab' DFMT system were performed.

**Fab'<sub>DARA</sub> + Fab'<sub>RTX</sub> DFMT Median-Effect Plots**

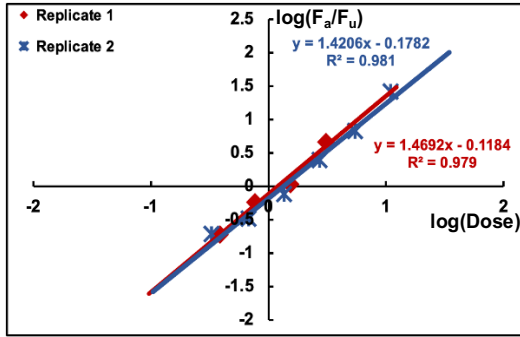

**Fab'<sub>DARA</sub> + Fab'<sub>RTX</sub> DFMT Combination Index Plots**

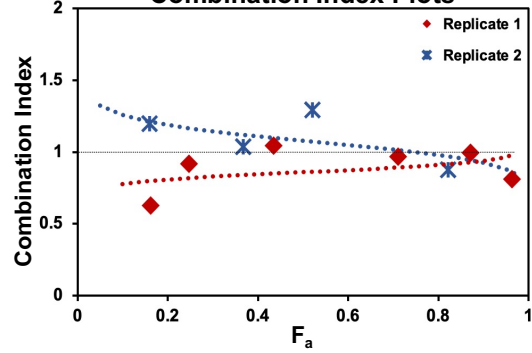

**[Fab'<sub>RTX</sub>-MORF1] Comparison**

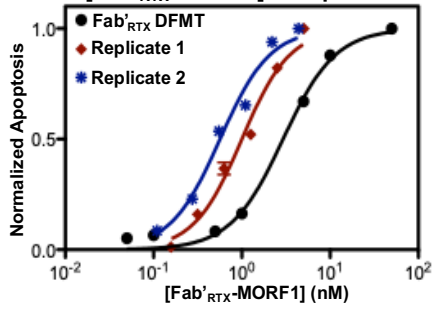

**[Fab'<sub>DARA</sub>-MORF1] Comparison**

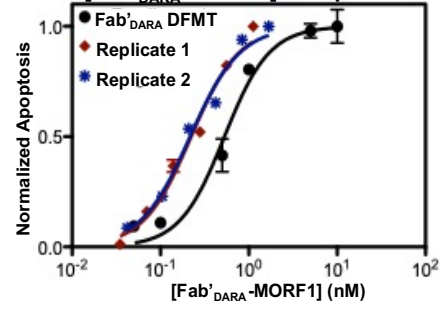

| Treatment Group | Fab' <sub>DARA</sub> -MORF1 (nM) | Fab' <sub>RTX</sub> -MORF1 (nM) | Combined Dose (nM) |
|-----------------|----------------------------------|---------------------------------|--------------------|
| 1               | 1.6 (4X EC <sub>50</sub> )       | 7.2 (4X EC <sub>50</sub> )      | 8.6                |
| 2               | 0.8 (2X EC <sub>50</sub> )       | 3.6 (2X EC <sub>50</sub> )      | 4.4                |
| 3               | 0.4 (1X EC <sub>50</sub> )       | 1.8 (1X EC <sub>50</sub> )      | 2.2                |
| 4               | 0.2 (1/2X EC <sub>50</sub> )     | 0.9 (1/2X EC <sub>50</sub> )    | 1.1                |
| 5               | 0.1 (1/4X EC <sub>50</sub> )     | 0.45 (1/4X EC <sub>50</sub> )   | 0.55               |
| 6               | 0.04 (1/10X EC <sub>50</sub> )   | 0.18 (1/10X EC <sub>50</sub> )  | 0.22               |

| Fab' <sub>DARA</sub> + Fab' <sub>RTX</sub> DFMT | D <sub>m</sub> (nM) | m    | r     | Combination Index Values |                  |                  |
|-------------------------------------------------|---------------------|------|-------|--------------------------|------------------|------------------|
|                                                 |                     |      |       | ED <sub>75</sub>         | ED <sub>90</sub> | ED <sub>95</sub> |
| Replicate 1                                     | 1.20                | 1.47 | 0.989 | 0.999                    | 0.926            | 0.880            |
| Replicate 2                                     | 1.33                | 1.42 | 0.990 | 0.904                    | 0.947            | 0.979            |

**Figure S6.** Fab'<sub>DARA</sub> + Fab'<sub>RTX</sub> DFMT combination index experimental data.

**Fab'<sub>DARA</sub> + Fab'<sub>OBN</sub> DFMT Median-Effect Plots**

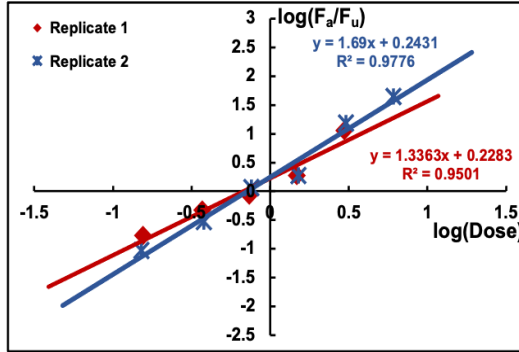

**Fab'<sub>DARA</sub> + Fab'<sub>RTX</sub> DFMT Combination Index Plots**

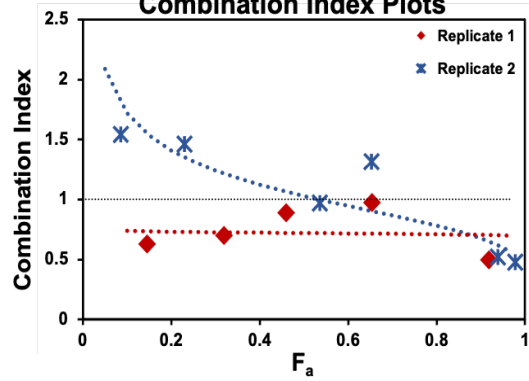

**[Fab'<sub>DARA</sub>-MORF1] Comparison**

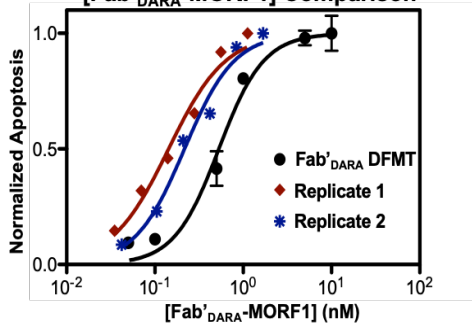

**[Fab'<sub>OBN</sub>-MORF1] Comparison**

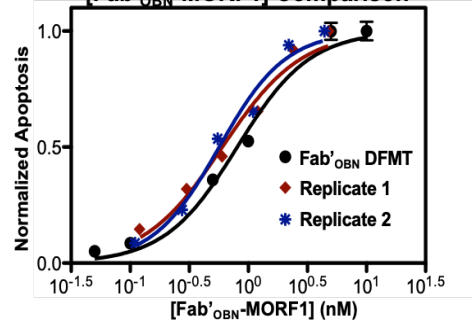

| Treatment Group | Fab' <sub>DARA</sub> -MORF1 (nM) | Fab' <sub>OBN</sub> -MORF1 (nM) | Combined Dose (nM) |
|-----------------|----------------------------------|---------------------------------|--------------------|
| 1               | 1.6 (4X EC <sub>50</sub> )       | 4.8 (4X EC <sub>50</sub> )      | 6.4                |
| 2               | 0.8 (2X EC <sub>50</sub> )       | 2.4 (2X EC <sub>50</sub> )      | 3.2                |
| 3               | 0.4 (1X EC <sub>50</sub> )       | 1.2 (1X EC <sub>50</sub> )      | 1.6                |
| 4               | 0.2 (1/2X EC <sub>50</sub> )     | 0.6 (1/2X EC <sub>50</sub> )    | 0.8                |
| 5               | 0.1 (1/4X EC <sub>50</sub> )     | 0.3 (1/4X EC <sub>50</sub> )    | 0.4                |
| 6               | 0.04 (1/10X EC <sub>50</sub> )   | 0.12 (1/10X EC <sub>50</sub> )  | 0.16               |

| Fab' <sub>DARA</sub> + Fab' <sub>OBN</sub> DFMT | D <sub>m</sub> (nM) | m    | r     | Combination Index Values |                  |                  |
|-------------------------------------------------|---------------------|------|-------|--------------------------|------------------|------------------|
|                                                 |                     |      |       | ED <sub>75</sub>         | ED <sub>90</sub> | ED <sub>95</sub> |
| Replicate 1                                     | 0.675               | 1.34 | 0.975 | 0.711                    | 0.704            | 0.699            |
| Replicate 2                                     | 0.718               | 1.69 | 0.989 | 0.825                    | 0.678            | 0.601            |

**Figure S7.** Fab'<sub>DARA</sub> + Fab'<sub>OBN</sub> DFMT combination index experimental data.

**Fab'ISA + Fab'RTX DFMT Median-Effect Plots**

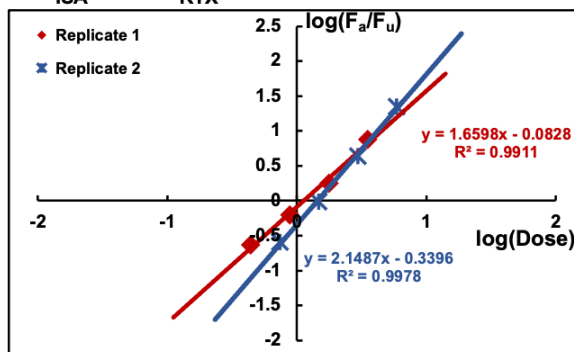

**Fab'ISA + Fab'RTX DFMT Combination Index Plots**

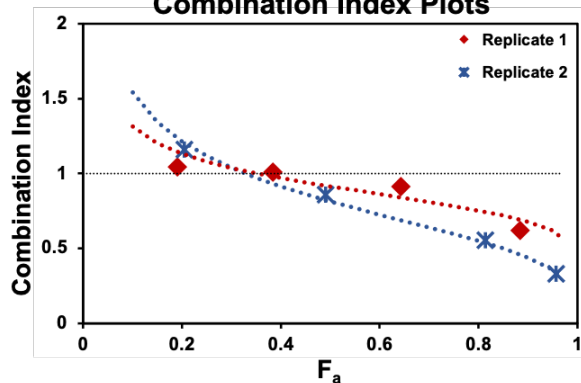

**[Fab'ISA-MORF1] Comparison**

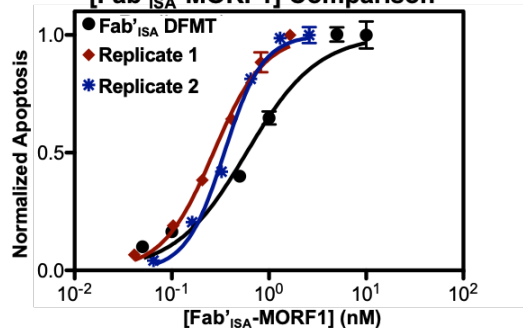

**[Fab'RTX-MORF1] Comparison**

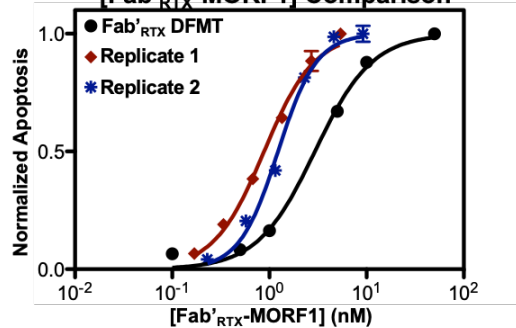

| Treatment Group | Fab'ISA-MORF1 (nM)              | Fab'RTX-MORF1 (nM)             | Combined Dose (nM) |
|-----------------|---------------------------------|--------------------------------|--------------------|
| 1               | 2.2 (4X EC <sub>50</sub> )      | 7.2 (4X EC <sub>50</sub> )     | 9.4                |
| 2               | 1.1 (2X EC <sub>50</sub> )      | 3.6 (2X EC <sub>50</sub> )     | 4.7                |
| 3               | 0.55 (1X EC <sub>50</sub> )     | 1.8 (1X EC <sub>50</sub> )     | 2.35               |
| 4               | 0.275 (1/2X EC <sub>50</sub> )  | 0.9 (1/2X EC <sub>50</sub> )   | 1.175              |
| 5               | 0.1375 (1/4X EC <sub>50</sub> ) | 0.45 (1/4X EC <sub>50</sub> )  | 0.5875             |
| 6               | 0.055 (1/10X EC <sub>50</sub> ) | 0.18 (1/10X EC <sub>50</sub> ) | 0.235              |

| Fab'ISA + Fab'RTX DFMT | D <sub>m</sub> (nM) | m    | r     | Combination Index Values |                  |                  |
|------------------------|---------------------|------|-------|--------------------------|------------------|------------------|
|                        |                     |      |       | ED <sub>75</sub>         | ED <sub>90</sub> | ED <sub>95</sub> |
| Replicate 1            | 1.12                | 1.66 | 0.996 | 0.768                    | 0.655            | 0.588            |
| Replicate 2            | 1.44                | 2.15 | 0.998 | 0.596                    | 0.438            | 0.357            |

**Figure S8.** Fab'ISA + Fab'RTX DFMT combination index experimental data.

**Fab'ISA + Fab'OBN DFMT Median-Effect Plots**

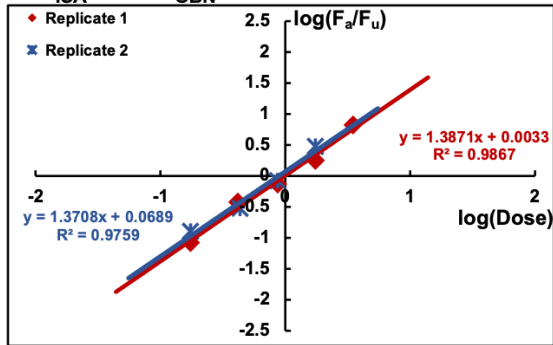

**Fab'ISA + Fab'OBN DFMT Combination Index Plots**

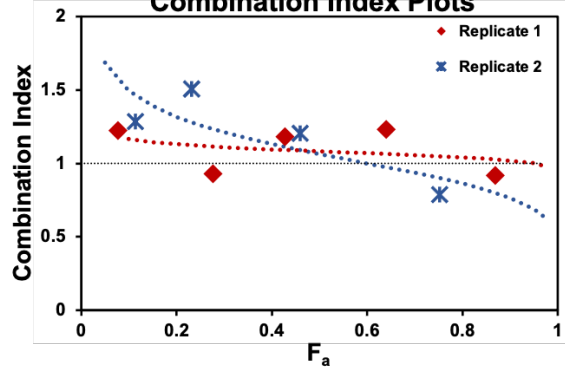

**[Fab'ISA-MORF1] Comparison**

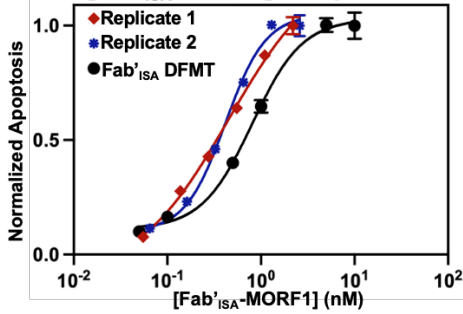

**[Fab'OBN-MORF1] Comparison**

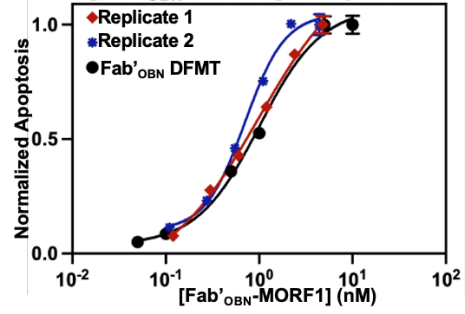

| Treatment Group | Fab'ISA-MORF1 (nM)              | Fab'OBN-MORF1 (nM)             | Combined Dose (nM) |
|-----------------|---------------------------------|--------------------------------|--------------------|
| 1               | 2.2 (4X EC <sub>50</sub> )      | 4.8 (4X EC <sub>50</sub> )     | 7                  |
| 2               | 1.1 (2X EC <sub>50</sub> )      | 2.4 (2X EC <sub>50</sub> )     | 3.5                |
| 3               | 0.55 (1X EC <sub>50</sub> )     | 1.2 (1X EC <sub>50</sub> )     | 1.75               |
| 4               | 0.275 (1/2X EC <sub>50</sub> )  | 0.6 (1/2X EC <sub>50</sub> )   | 0.875              |
| 5               | 0.1375 (1/4X EC <sub>50</sub> ) | 0.3 (1/4X EC <sub>50</sub> )   | 0.4375             |
| 6               | 0.055 (1/10X EC <sub>50</sub> ) | 0.12 (1/10X EC <sub>50</sub> ) | 0.175              |

| Fab'ISA + Fab'OBN DFMT | D <sub>m</sub> (nM) | m    | r     | Combination Index Values |                  |                  |
|------------------------|---------------------|------|-------|--------------------------|------------------|------------------|
|                        |                     |      |       | ED <sub>75</sub>         | ED <sub>90</sub> | ED <sub>95</sub> |
| Replicate 1            | 0.995               | 1.39 | 0.993 | 1.04                     | 1.01             | 0.991            |
| Replicate 2            | 0.891               | 1.37 | 0.989 | 0.901                    | 0.767            | 0.688            |

**Figure S9.** Fab'ISA + Fab'OBN DFMT combination index experimental data.



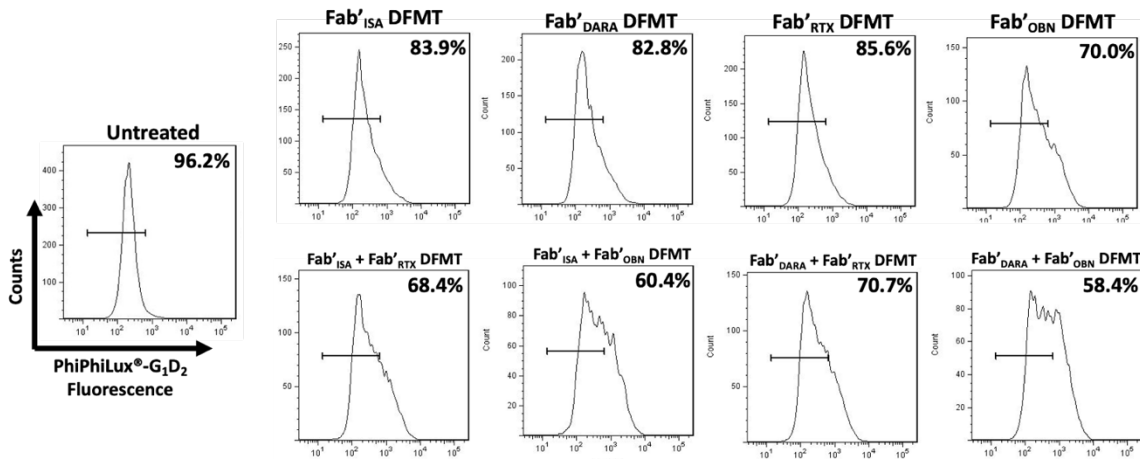

**Figure S10.** Caspase 3 activation experiment histograms from flow cytometry. Corresponds with bar graph data presented in Figure 5C.

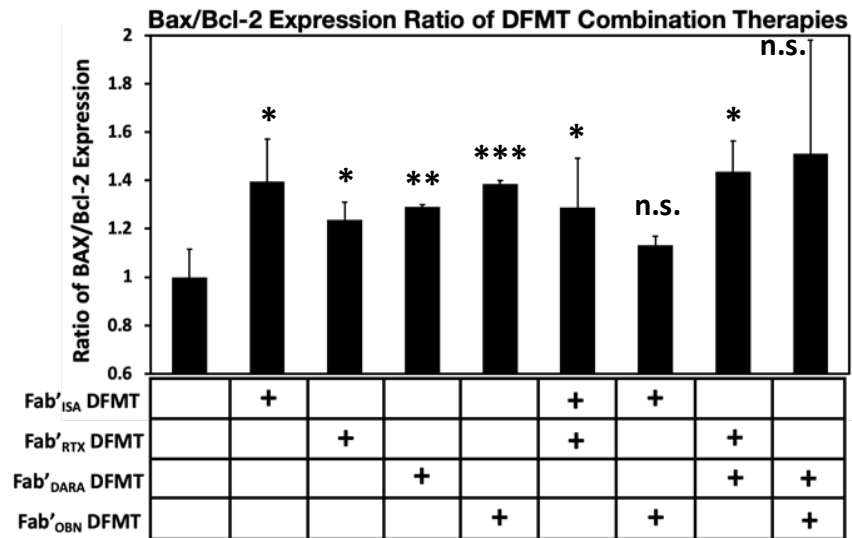

**Figure S11.** Bcl-2 and Bax protein expression presented as a ratio of Bax / Bcl-2 of Raji cells treated with various Fab' DFMT systems. Bcl-2 and Bax protein expression was quantified using immunostaining of the two proteins and fluorescence quantified using flow cytometry. Higher Bax-to-Bcl-2 ratio indicates a proapoptotic state in the treated cells. \*\*\*  $p < 0.001$ , \*\*  $p < 0.01$ , \*  $p < 0.05$ , n.s. not significant by One-Way ANOVA and Tukey test.

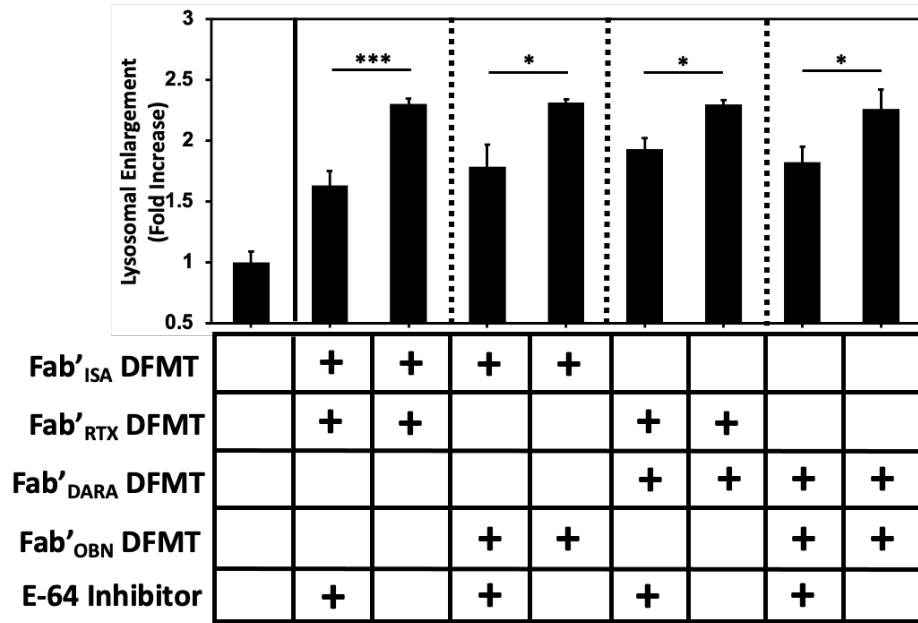

**Figure S12.** Lysosomal enlargement inhibition of dual-target DFMT treated Raji cells with or without co-treatment with E-64 cysteine proteinase inhibitor. Corresponds to histograms presented in main text Figure 7D. \*\*\*  $p < 0.001$ , \*  $p < 0.05$  by One-Way ANOVA and Tukey test.

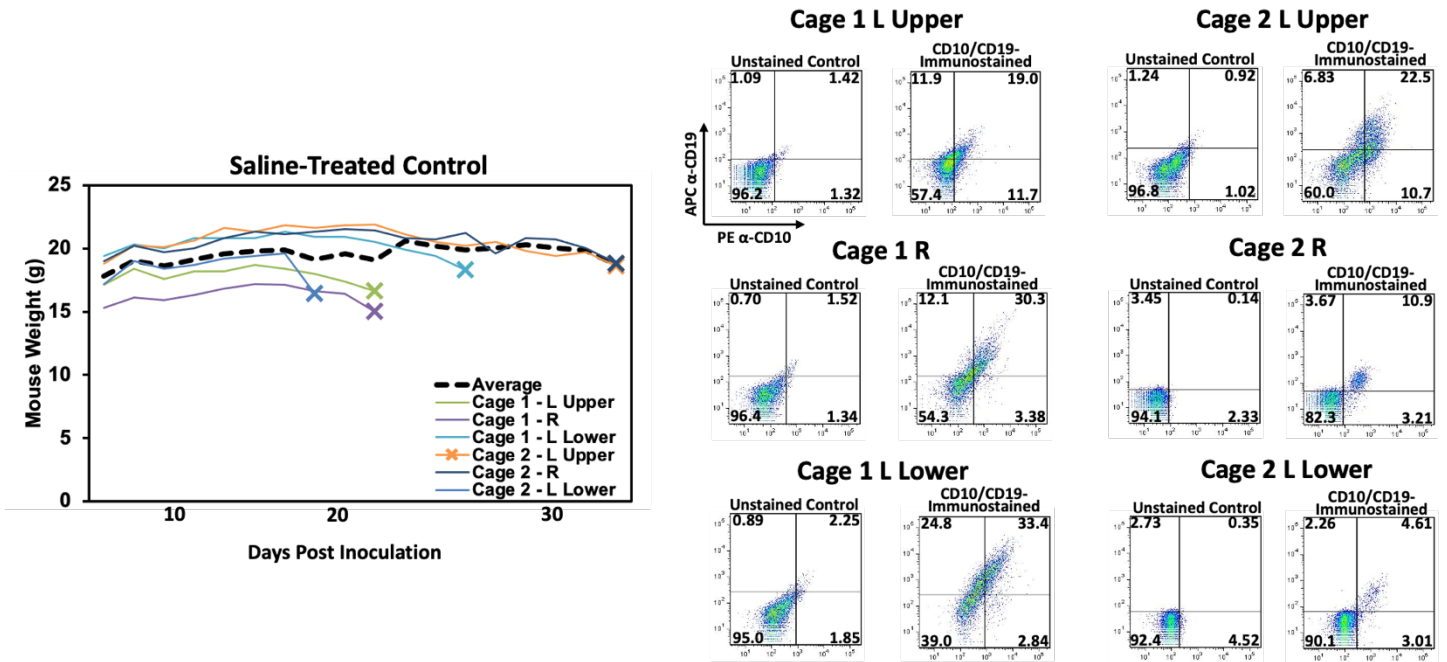

**Figure S13.** In vivo dual-target DFMT. Saline-treated mouse cohort. Body weights and bone marrow immunostaining for human  $\alpha$ -CD10 and human  $\alpha$ -CD19 antibodies.

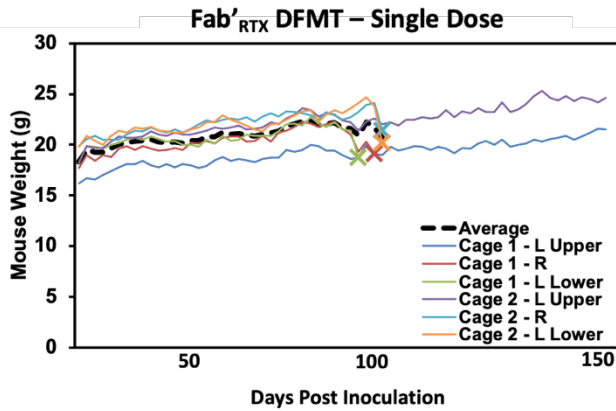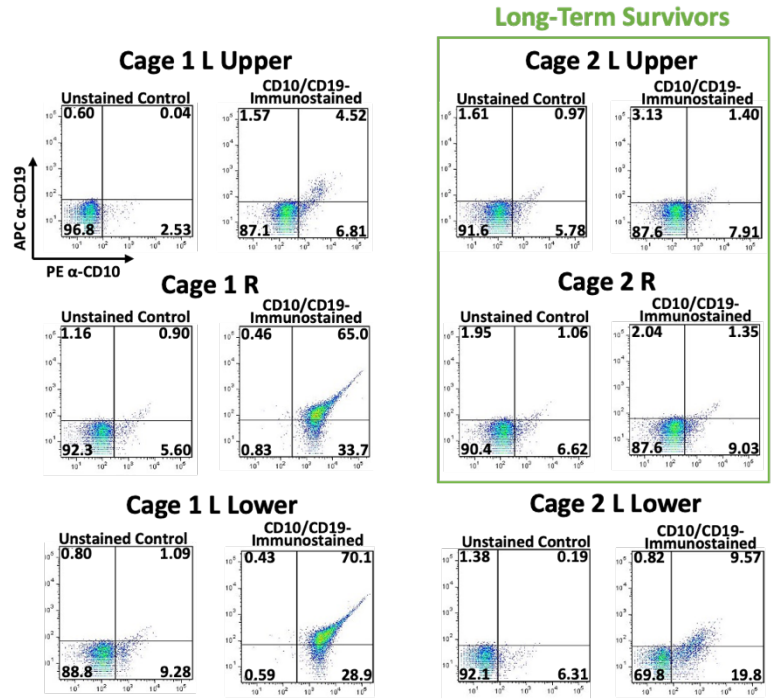

**Figure S14.** In vivo dual-target DFMT. Fab'RTX DFMT single dose mouse cohort. Body weights and bone marrow immunostaining with human  $\alpha$ -CD10 and human  $\alpha$ -CD19 antibodies. Long-term surviving mice indicated with green box.

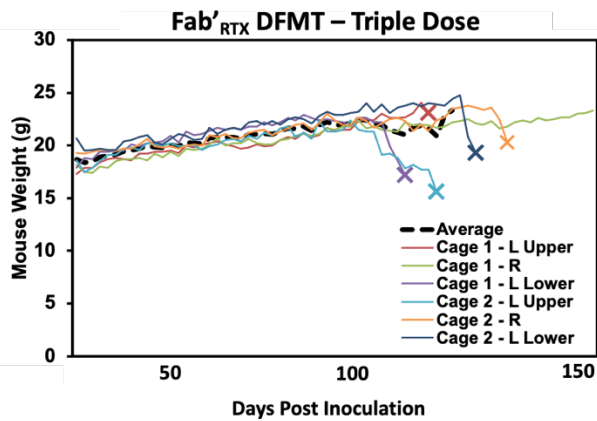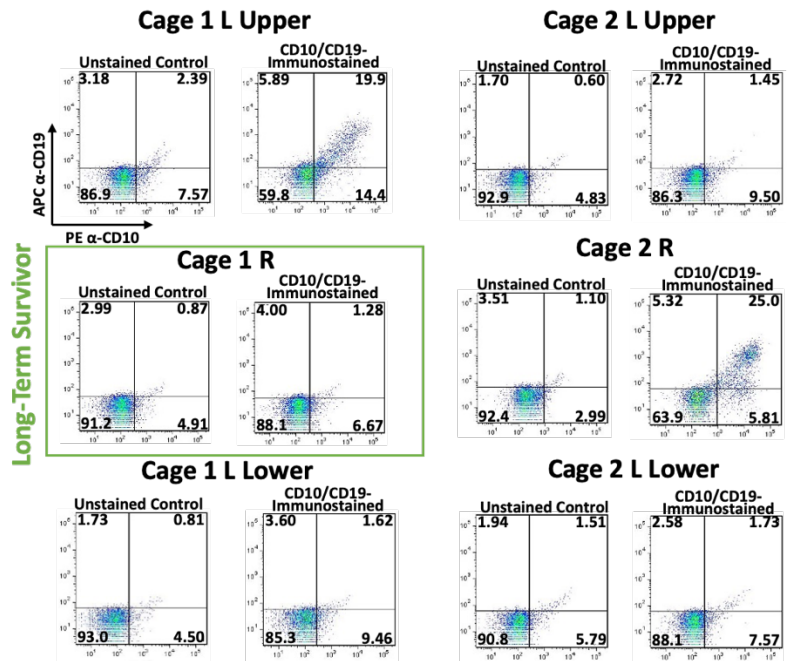

**Figure S15.** In vivo dual-target DFMT. Fab'RTX DFMT triple dose mouse cohort. Body weights and bone marrow immunostaining for human  $\alpha$ -CD10 and human  $\alpha$ -CD19 antibodies. Long-term surviving mice indicated with green box.

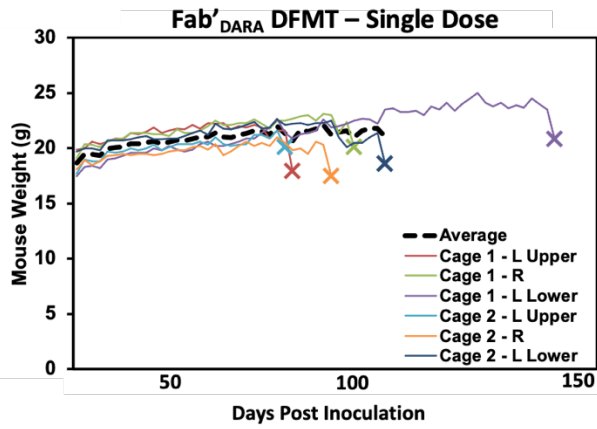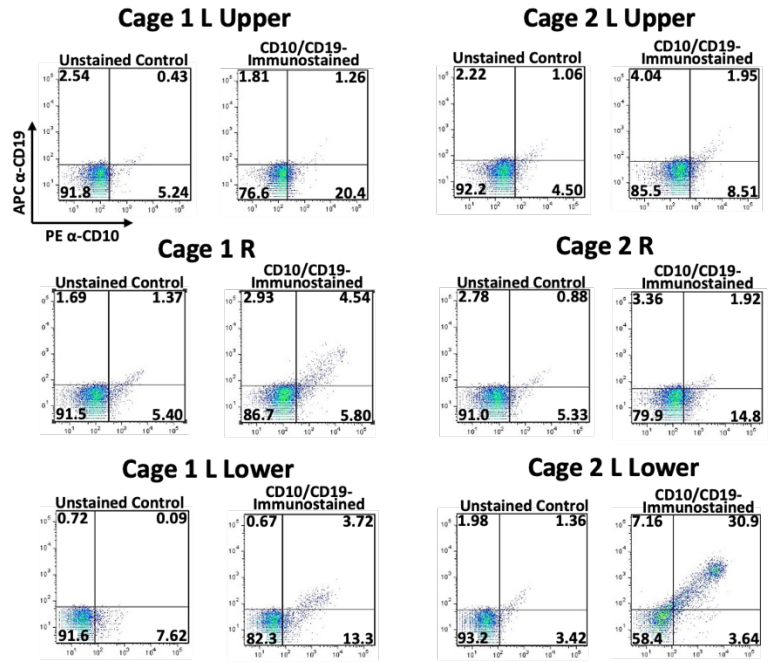

**Figure S16.** In vivo dual-target DFMT. Fab<sub>DARA</sub> DFMT single dose mouse cohort. Body weights and bone marrow immunostaining for human  $\alpha$ -CD10 and human  $\alpha$ -CD19 antibodies.

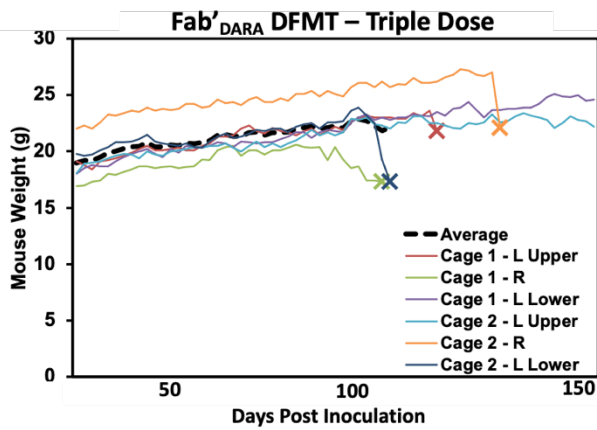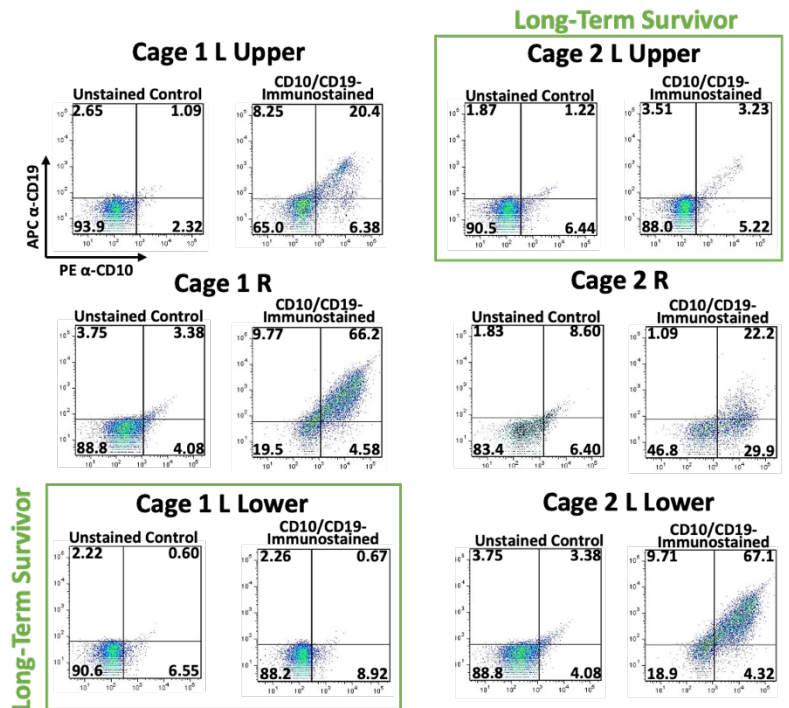

**Figure S17.** In vivo dual-target DFMT. Fab<sub>DARA</sub> DFMT triple dose mouse cohort. Body weights and bone marrow immunostaining for human  $\alpha$ -CD10 and human  $\alpha$ -CD19 antibodies. Long-term surviving mice indicated with green boxes.

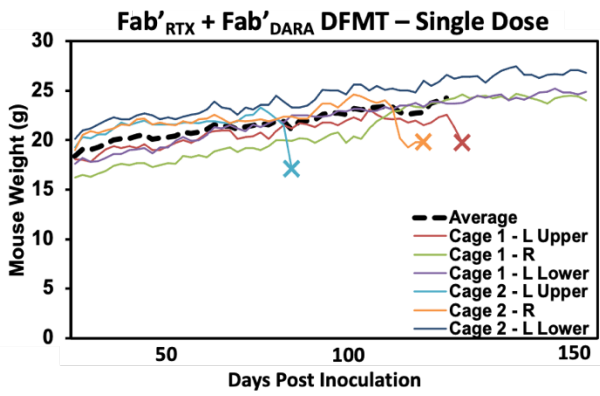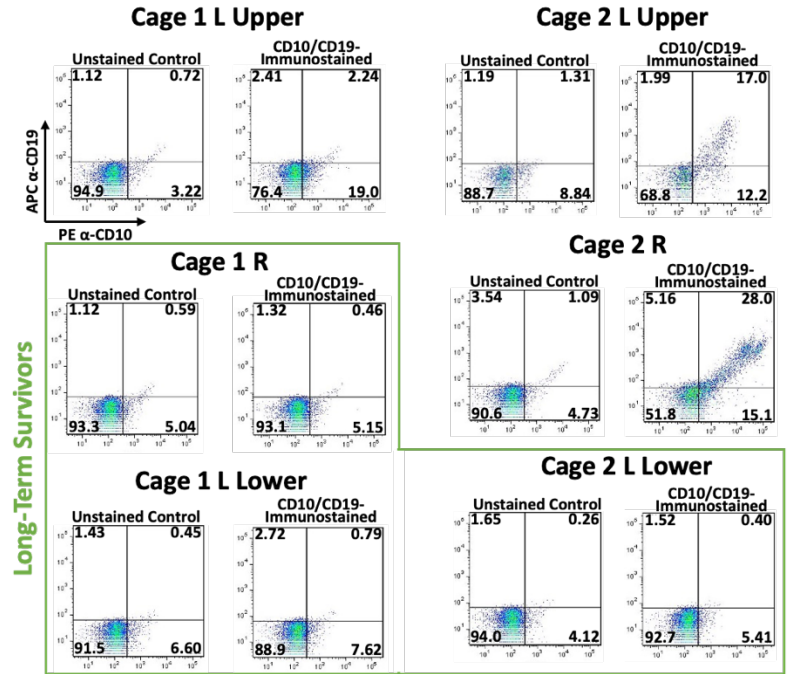

**Figure S18.** In vivo dual-target DFMT. Dual-target DFMT single dose mouse cohort. Body weights and bone marrow immunostaining for human  $\alpha$ -CD10 and human  $\alpha$ -CD19 antibodies. Long-term surviving mice indicated with green box.

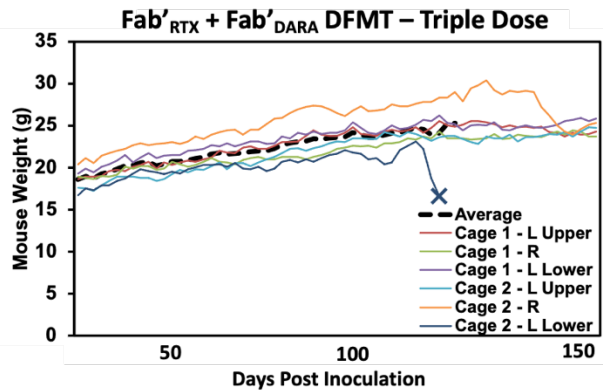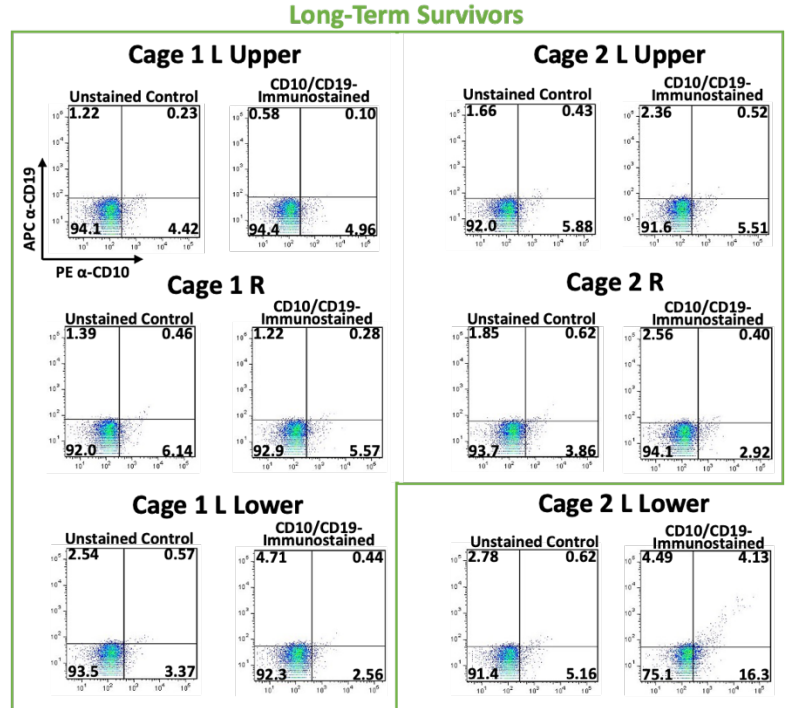

**Figure S19.** In vivo dual-target DFMT. Dual-target DFMT triple dose mouse cohort. Body weights and bone marrow immunostaining for human  $\alpha$ -CD10 and human  $\alpha$ -CD19 antibodies. Long-term surviving mice indicated with green box.
